# Supplementary material for: Coating Novozyme435 with an ionic liquid: more than just a coating for the efficient ring-opening polymerization of δ-valerolactone
Source: Royal Society of Chemistry journal article supplement (doi:10.1039/c5ra10227h), 2015-01-01
Supplement: c5ra10227h1.pdf [file c5ra10227h1.pdf]

## Supporting Information

### Coating Novozyme435 with ionic liquid: more than just coating for efficient ring-opening polymerization of $\delta$ -valerolactone

Ye He, Jian-Jie Li, Yan-Kui Luo, Fei Song,\* Xiu-Li Wang,\* Yu-Zhong Wang

Center for Degradable and Flame-Retardant Polymeric Materials (ERCPM-MoE), College of Chemistry, State Key Laboratory of Polymer Materials Engineering, National Engineering Laboratory of Eco-Friendly Polymeric Materials (Sichuan), Sichuan University, 29 Wangjiang Road, Chengdu 610064, China.

E-mail: [songfei520@gmail.com](mailto:songfei520@gmail.com), [xiuliwang1@163.com](mailto:xiuliwang1@163.com).

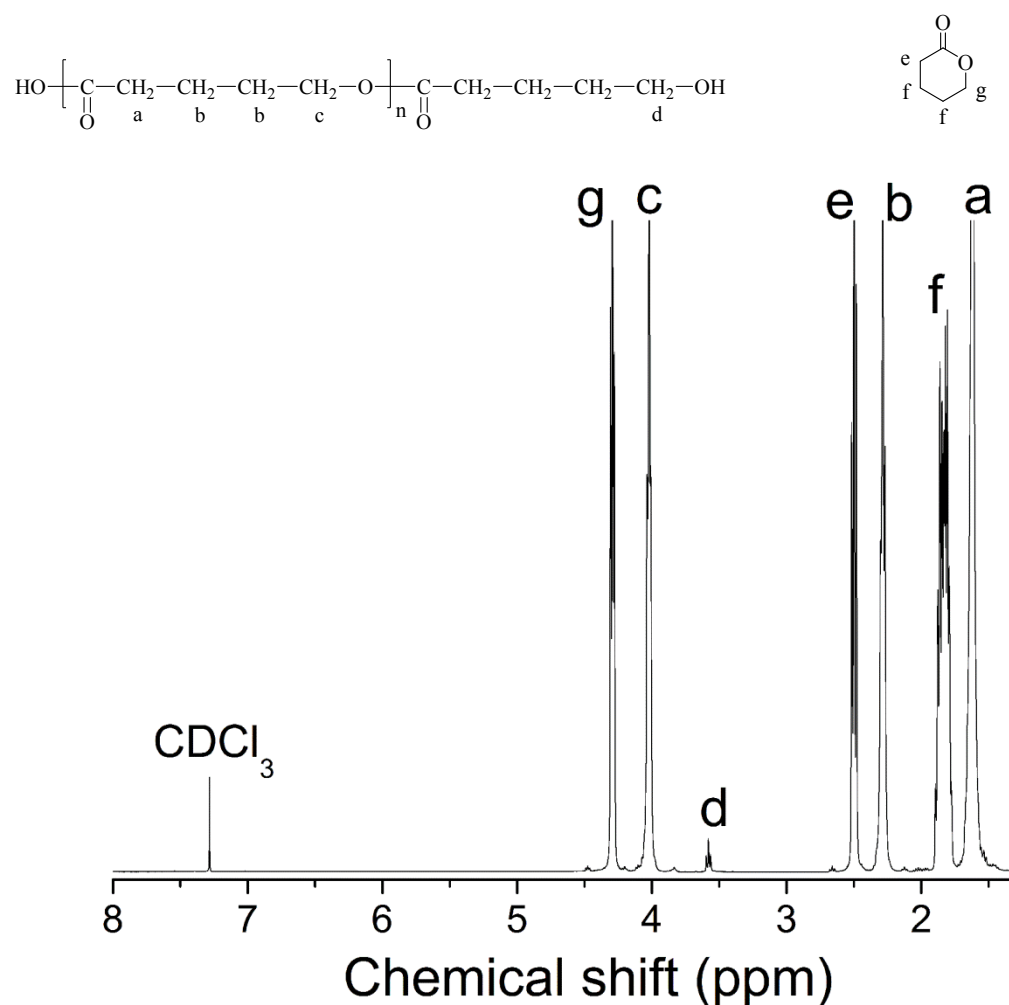

Figure S1.  $^1\text{H-NMR}$  spectra of crude PVL in  $\text{CDCl}_3$

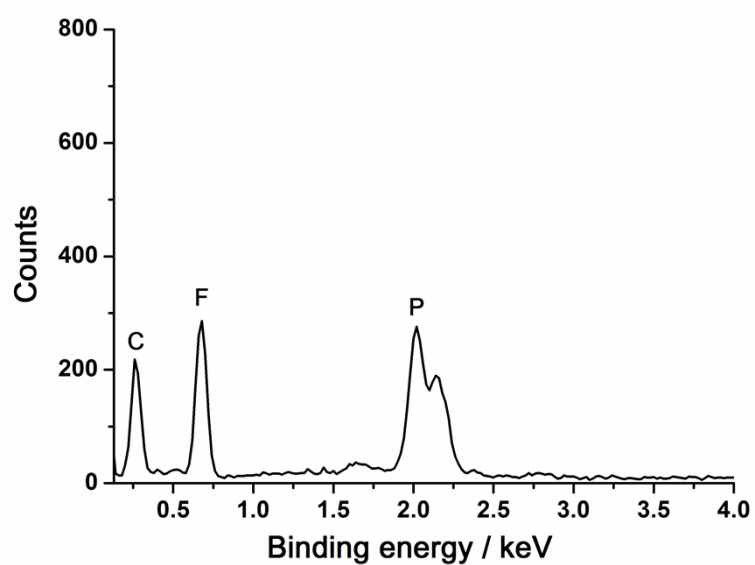

**Figure S2.**EDX spectra of Novozyme435 after treatment with [Omim][PF<sub>6</sub>]

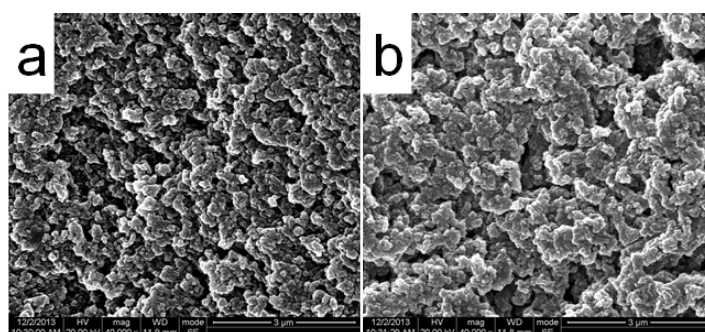

**Figure S3.** SEM images of Novozyme435 (a) and ILCE (b) after ROP reaction

**Table S1.**Recovery rate of Novozyme435 and [Omim][PF<sub>6</sub>] coated-Novozyme435 after ROP reaction

| Reaction Run | Novozyme43 | [Omim][PF <sub>6</sub> ] coated-Novozyme435 |
|--------------|------------|---------------------------------------------|
| 1            | 93.0%      | 98.0%                                       |
| 2            | 83.9%      | 87.9%                                       |
